# Supplementary material for: Modified mesoporous silica nanoparticles as a reusable, selective chromogenic sensor for mercury(ii) recognition
Source: Royal Society of Chemistry journal article supplement (doi:10.1039/c2dt32243a), 2012-12-21
Supplement: c2dt32243a.pdf [file c2dt32243a.pdf]

## Modified mesoporous silica nanoparticles as a reusable, “naked-eye” selective sensor of mercury(II)

Guzmán Sánchez,<sup>a</sup> David Curiel,<sup>a</sup> Imma Ratera<sup>b</sup>, Alberto Tárraga<sup>\*a</sup>, Jaume Veciana<sup>\*b</sup>  
and Pedro Molina<sup>\*a</sup>

### ELECTRONIC SUPPLEMENTARY INFORMATION

|                                             |    |
|---------------------------------------------|----|
| NMR spectra.....                            | 2  |
| UV-Vis spectrum of <b>2</b> .....           | 4  |
| Irradiation experiments on <b>2</b> .....   | 5  |
| Titrations at different concentrations..... | 7  |
| Job Plot of [2·Hg].....                     | 8  |
| Mass spectra.....                           | 9  |
| Absorption titrations.....                  | 10 |
| FTIR ATR spectrum of <b>2</b> .....         | 13 |
| UV-Vis spectrum of <b>2</b> .....           | 14 |
| Fitplot.....                                | 15 |

## NMR spectra

### $^1\text{H-NMR}$ and $^{13}\text{C-NMR}$ spectra of **1**

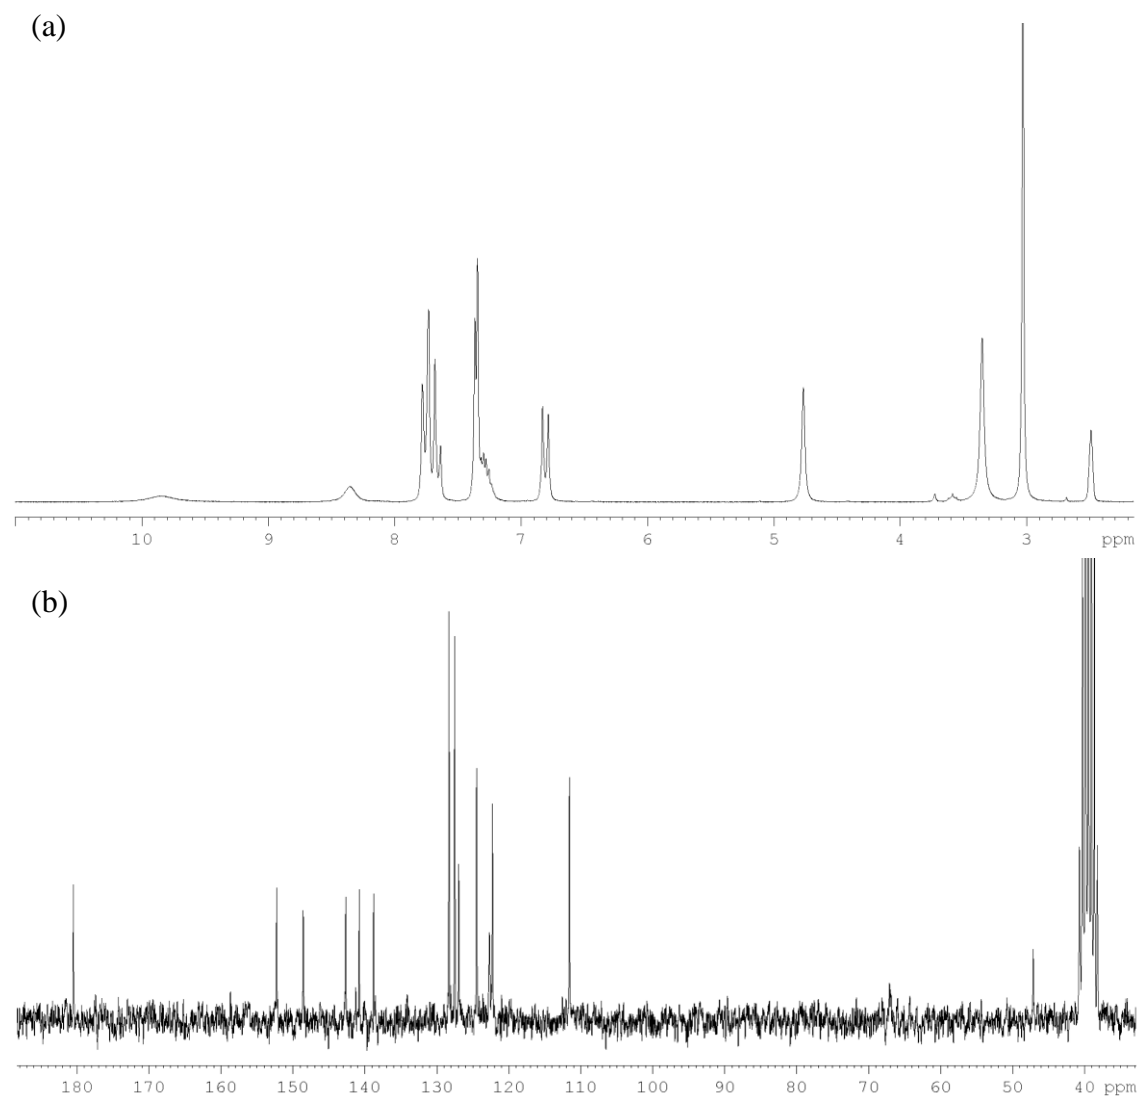

**Figure S1.**  $^1\text{H-NMR}$  (a) and  $^{13}\text{C-NMR}$  (b) spectra of **1**.

## $^1\text{H-NMR}$ and $^{13}\text{C-NMR}$ spectra of **2**

(a)

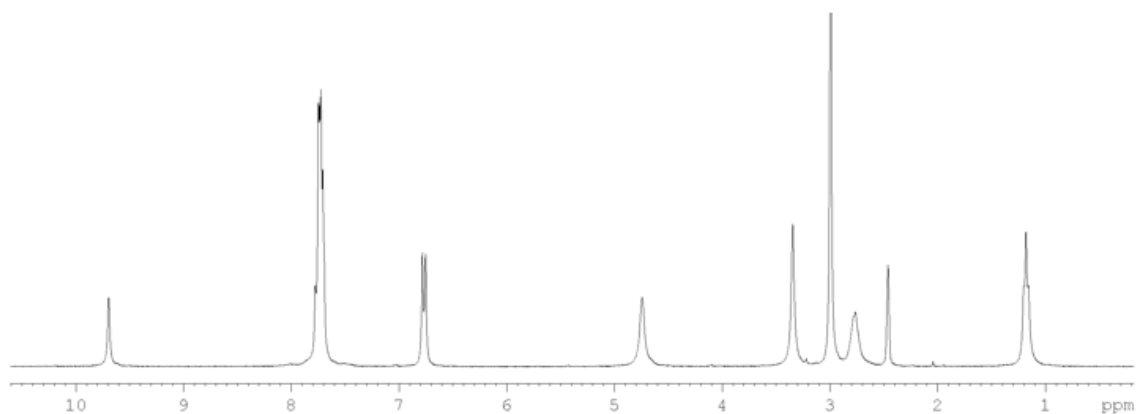

(b)

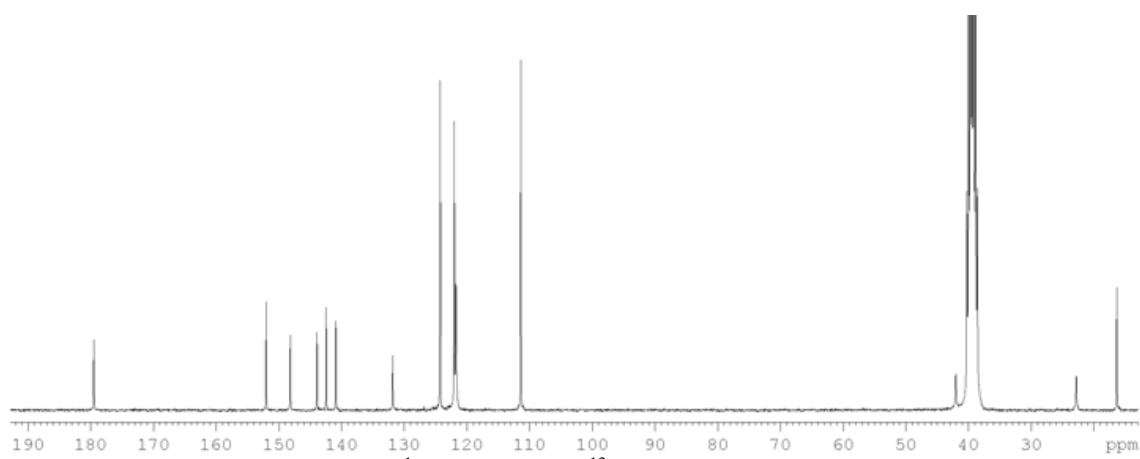

**Figure S2.**  $^1\text{H-NMR}$  (a) and  $^{13}\text{C-NMR}$  (b) spectra of **2**.

## UV-Vis spectrum of **2**

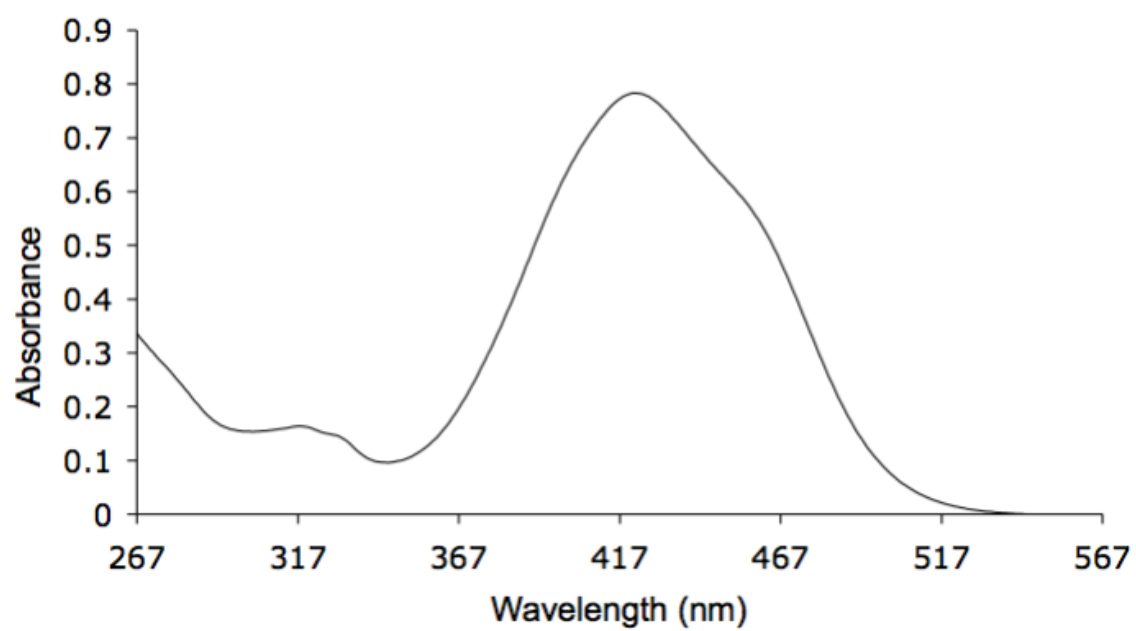

**Figure S3.** Absorption spectrum of **2** ( $c = 10^{-5} M$ ).

## Irradiation experiments on **2**

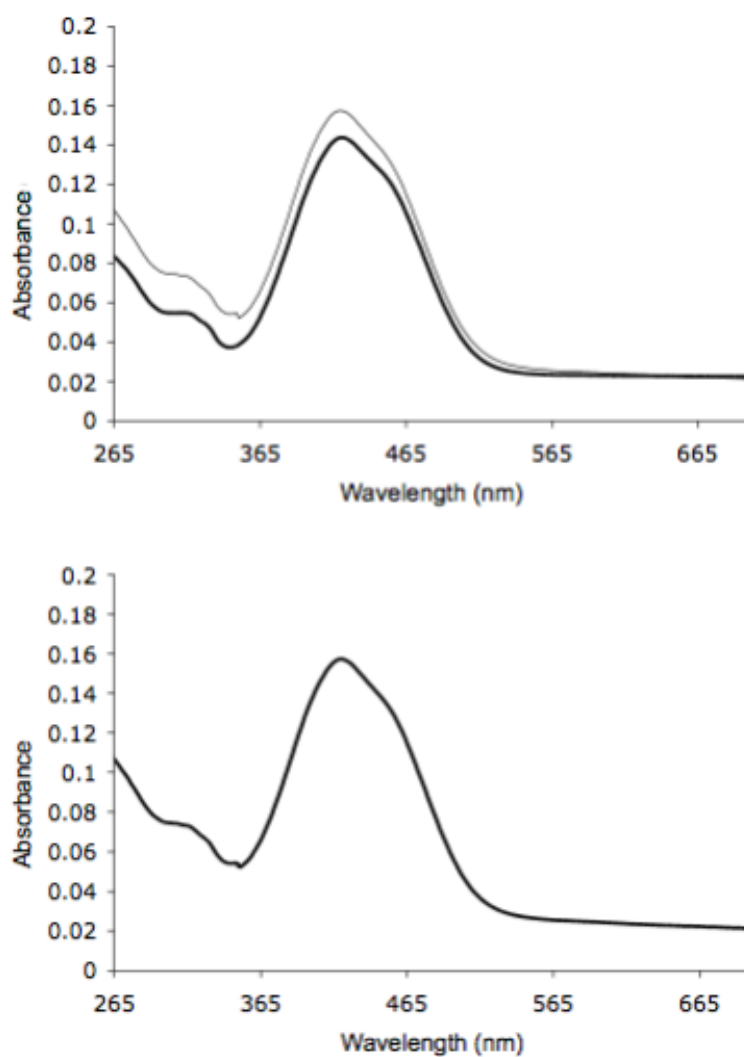

**Figure S4.** Top: spectrum of **2** (thick line) and spectrum of **2** after irradiation with  $\lambda = 500$  nm (30 min, thin line,  $[2] = 10^{-5}$  M). Bottom: UV-Vis spectra of **2** before (thick line) and after (thin line, overlapped) irradiation with  $\lambda = 360$  nm.

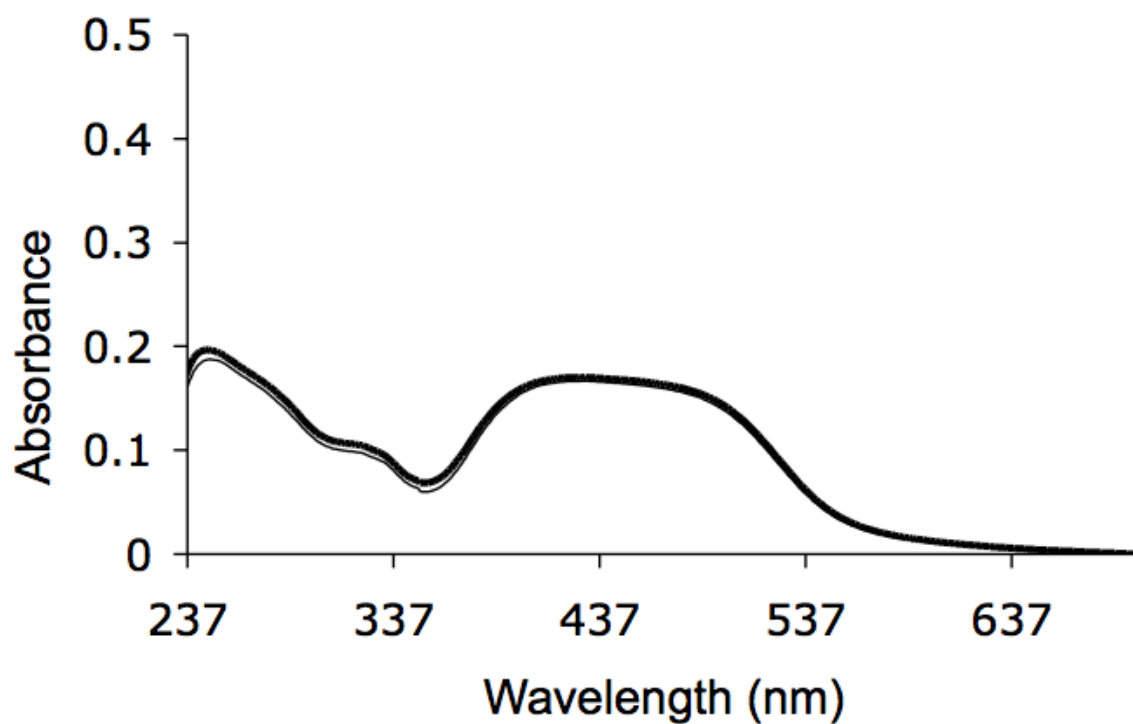

**Figure S5.** UV-Vis spectra of the complex [2·βCD] before (thick line) and after (thin line) irradiation with  $\lambda = 360$  nm ( $[2] = 10^{-5}$  M).

## Titration at different concentrations

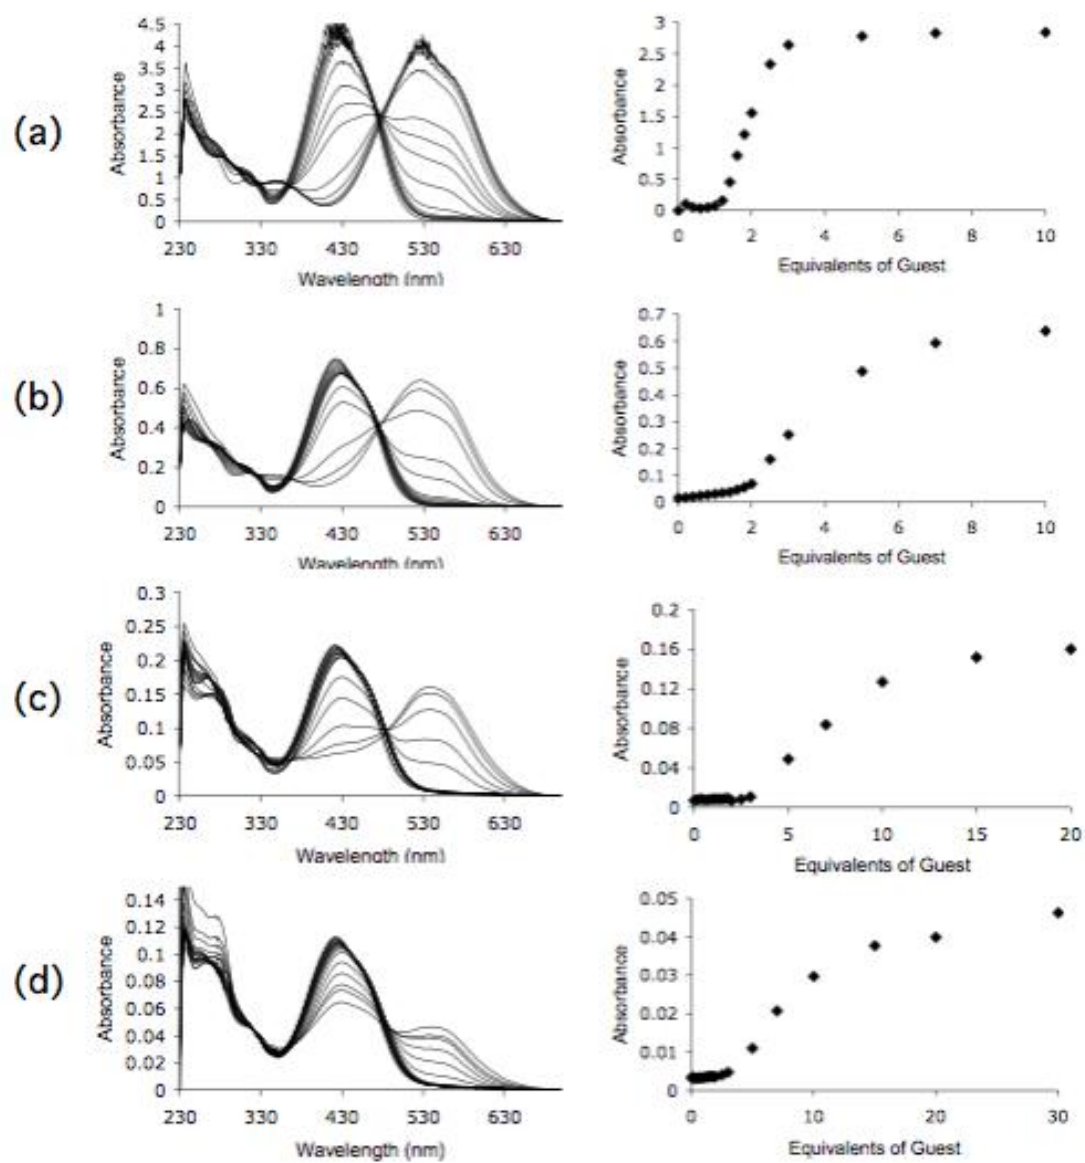

**Figure S6.** Titrations at different concentrations of host. (a)  $5 \times 10^{-5} M$ , (b)  $5 \times 10^{-6} M$ , (c),  $10^{-6} M$ , (d) and  $5 \times 10^{-7} M$ .

### Job Plot of [2·Hg]

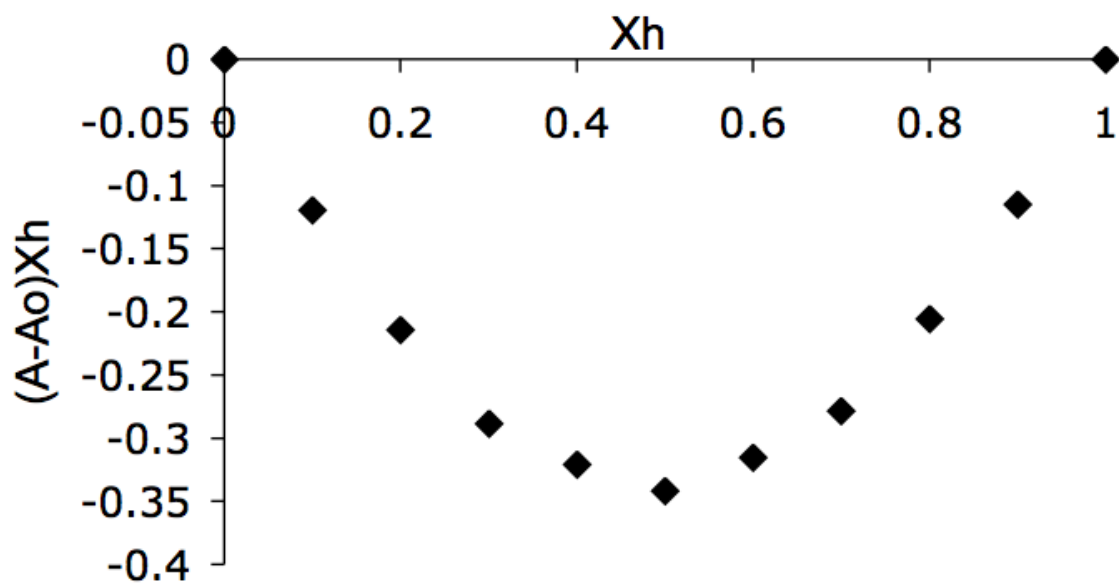

Figure S7. Job Plot of the complex [2·Hg] ( $c = 10^{-5} M$ )



## Mass spectra

(a)

Para ver esta película, debe  
disponer de QuickTime™ y de  
un descompresor .

(b)

Para ver esta película, debe  
disponer de QuickTime™ y de  
un descompresor .

**Figure S8.** Mass spectra corresponding to the complexes (a)  $[2 \cdot \text{Hg}]$  and (b)  $[2 \cdot \text{Hg}_2]$

## Absorption titrations

### General procedure

Stock solutions were prepared with HPLC grade solvents. In the case of receptors **1** and **2**, 3 mL of a freshly prepared 10  $\mu\text{M}$  solution were placed in a 1 cm cuvette and a UV spectrum was recorded. Then, aliquots of guest (all the cations as their triflate salts) were added and a spectrum was recorded immediately after each addition giving a set of spectra showing the behavior of the receptor towards each analyte.

For the nanoparticles **3** the same procedure was followed but working with 3 mL of a suspension of solid in the corresponding solvent (1 mg per mL).

### Titration of **2** with water

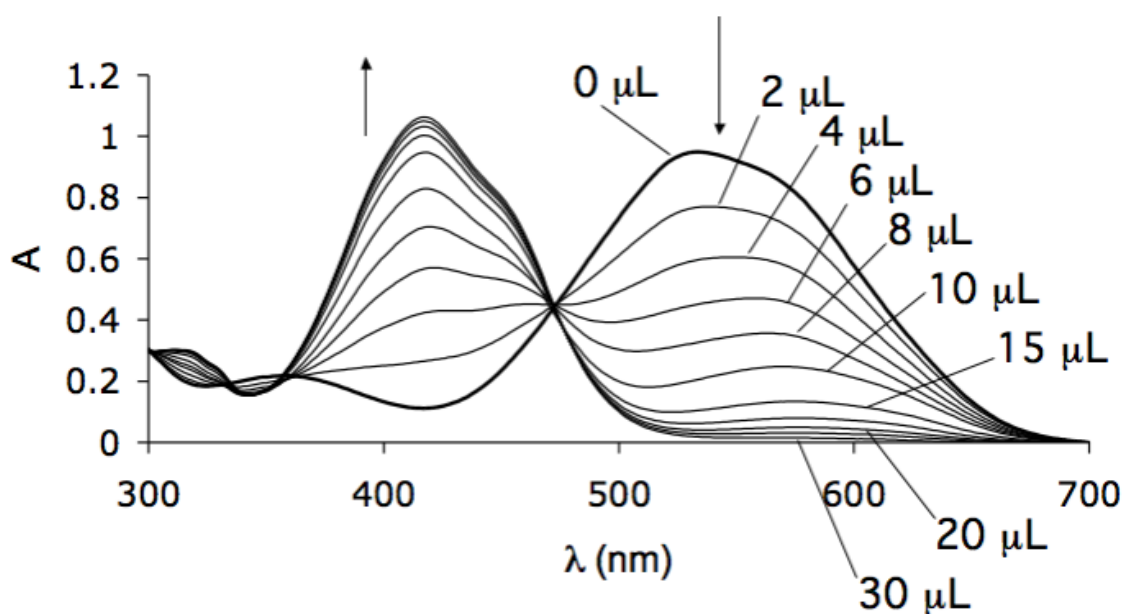

**Figure S9.** Evolution of absorption spectra of **2** upon addition of various amounts of water.

### Titration of **2** with cadmium and lead

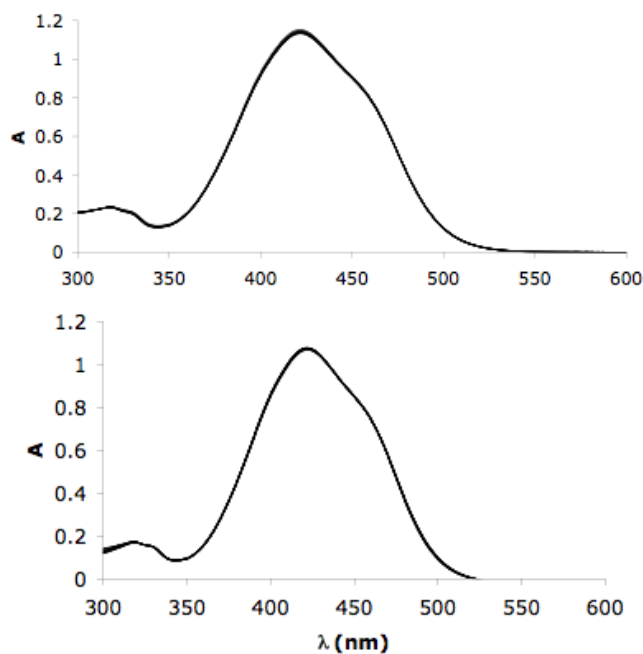

**Figure S10.** Evolution of absorption spectra of **2** upon titration with Pb(OTf)<sub>2</sub> (top) and Cd(OTf)<sub>2</sub> (bottom).

### Interfering cations

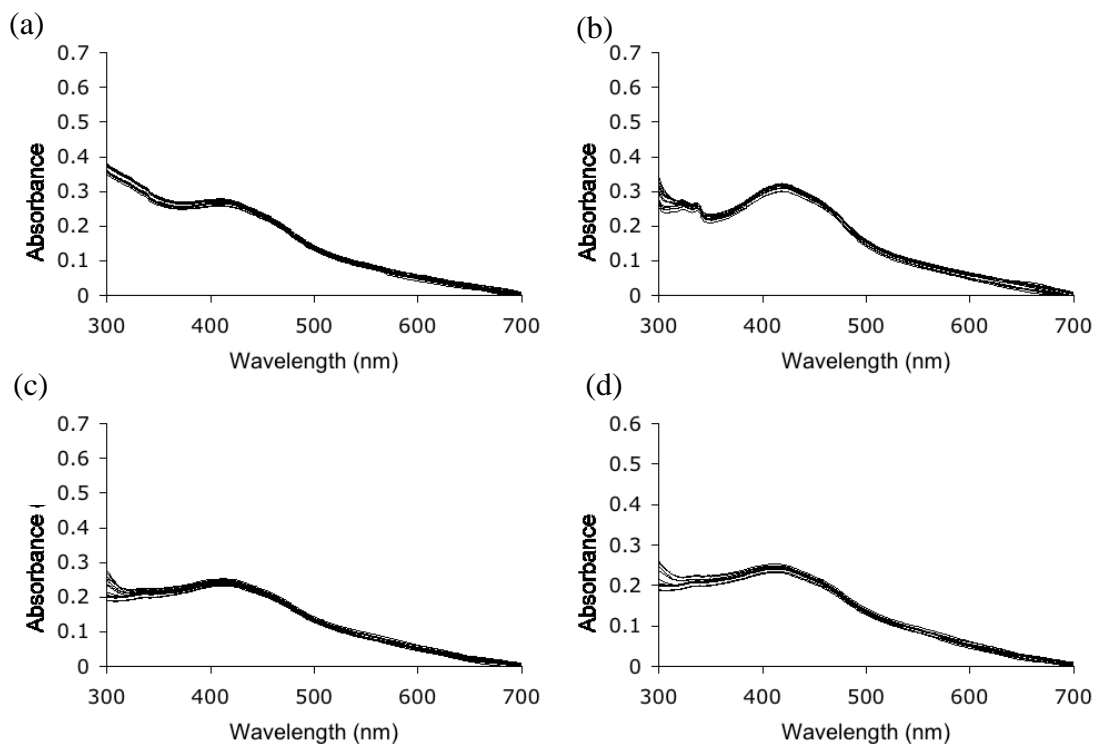

**Figure S11.** Evolution of absorption spectra upon titration of **3** with (a) Cd(II), (b) Zn(II), (c) Pb(II) and (d) Ag(I).

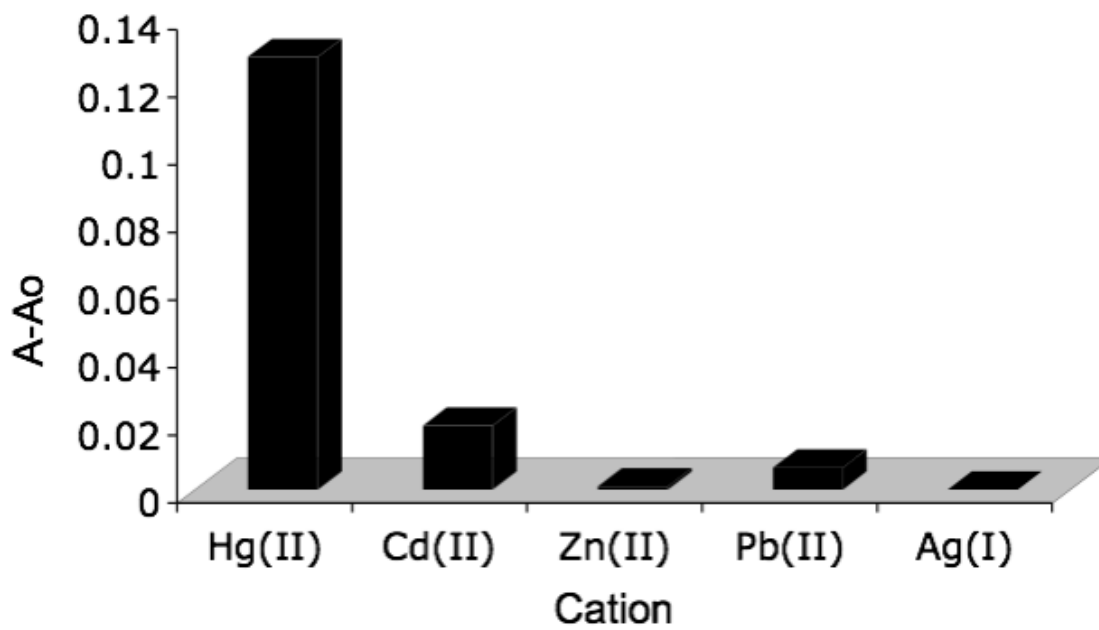

**Figure S12.** Comparative plot showing the selective response of **3** towards mercury(II).

### FT-IR ATR spectrum of 3

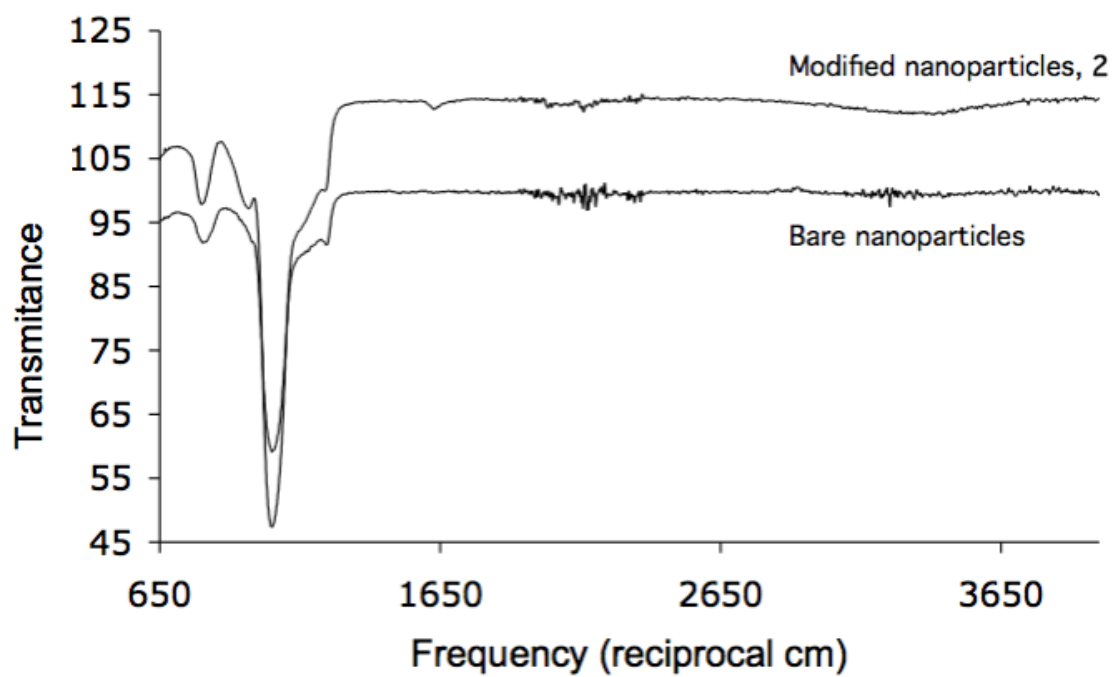

Figure S13. Selected FT-IR ATR spectra.

## UV-Vis spectrum of **3**

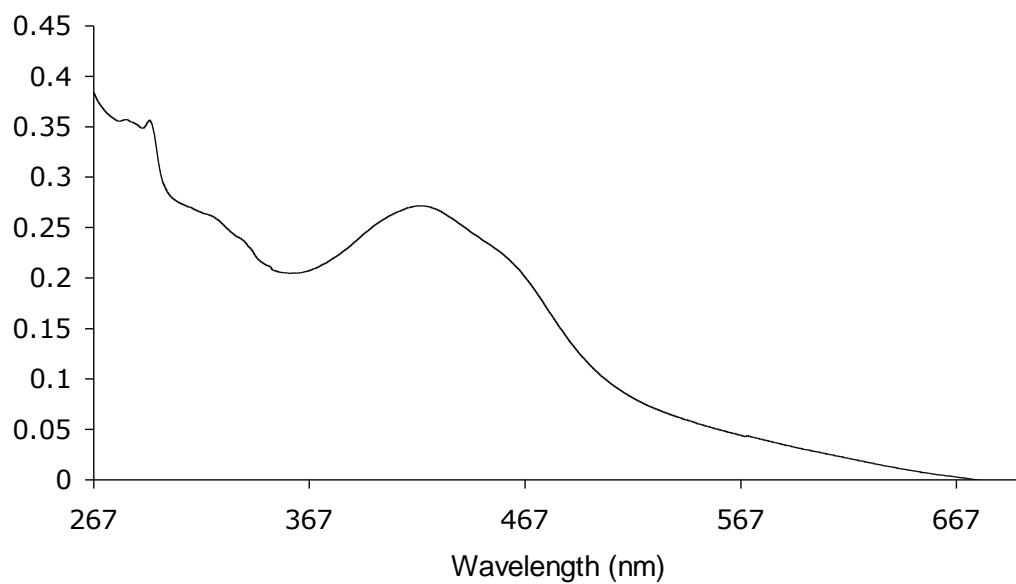

**Figure S14.** UV-Vis spectrum of a suspension of **3** (1 mg per mL) in THF.

## Fitplot of [3·Hg]

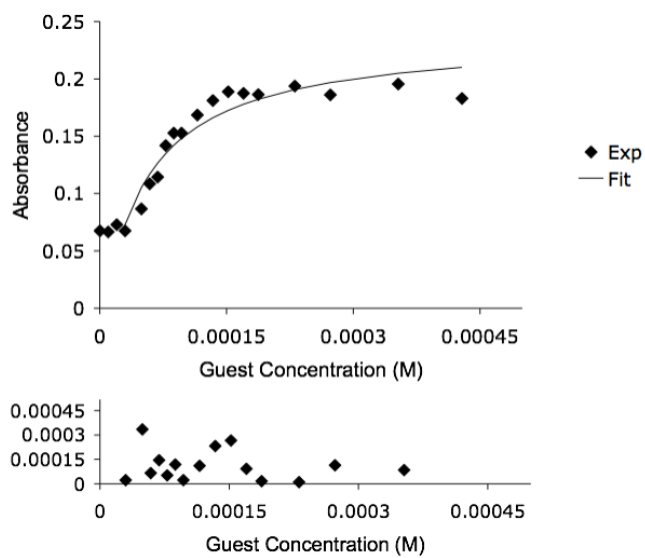

**Figure S15.** Fitplot of **3** upon titration with mercury(II) and residuals.
